# Supplementary material for: Predictors of visual acuity improvement after phacoemulsification cataract surgery
Source: Frontiers journal article supplement (doi:10.3389/fmed.2022.894541), 2022-09-21
Supplement: Table_1.pdf [file Table_1.pdf]

Supplementary Table 1. Comparison in pre-operative phacoemulsification cataract surgery risk scoring

| Study                | Year | New or used a previous one | Factors included in the risk calculation                                                                                                                                                                                                                                                                                                                                                                                                                                                                                                                                                                                                                                              | Scoring system                                                                                                                                                 |
|----------------------|------|----------------------------|---------------------------------------------------------------------------------------------------------------------------------------------------------------------------------------------------------------------------------------------------------------------------------------------------------------------------------------------------------------------------------------------------------------------------------------------------------------------------------------------------------------------------------------------------------------------------------------------------------------------------------------------------------------------------------------|----------------------------------------------------------------------------------------------------------------------------------------------------------------|
| Muhtaseb et al. (1)  | 2004 | New                        | <p>High risk (3 points each)</p> <ul style="list-style-type: none"> <li>Dense/total/white or brunescent cataract</li> <li>Pseudoexfoliation</li> <li>Phacodonesis</li> </ul> <p>Low risk (1 point each)</p> <ul style="list-style-type: none"> <li>Previous vitrectomy</li> <li>Corneal scarring</li> <li>Small pupil (3 mm)</li> <li>Shallow anterior chamber (depth,2.5 mm)</li> <li>Age.88 years</li> <li>High ametropia (.6 D of myopia or hyperopia)</li> <li>Posterior capsule plaque</li> <li>Posterior polar cataract</li> <li>Miscellaneous risks assessed by the surgeon (eg, poor position of eye/patient)</li> </ul>                                                      | Four risk groups:<br>group 1 (no added risk) 0 points; group 2 (low risk) 1–2 points; group 3 (moderate risk) 3–5 points; group 4 (high risk) 6 points or more |
| Kaur et al. (2)      | 2020 | New Literature review!!    | <ul style="list-style-type: none"> <li>hard sclerotic nucleus</li> <li>white cataract</li> <li>pseudoexfoliation</li> <li>posterior polar cataract</li> <li>subluxated cataract</li> <li>small pupil</li> </ul>                                                                                                                                                                                                                                                                                                                                                                                                                                                                       | Just identified risk factors                                                                                                                                   |
| Blomquist et al. (3) | 2011 | New                        | <p>On univariate analysis</p> <ul style="list-style-type: none"> <li>older age</li> <li>poor preoperative corrected distance visual acuity (CDVA)</li> <li>left eye</li> <li>history of trauma</li> <li>prior pars plana vitrectomy</li> <li>dementia</li> <li>phacodonesis</li> <li>zonule dehiscence</li> <li>posterior polar cataract</li> <li>white/mature cataract</li> <li>dense nuclear sclerotic cataract</li> <li>poor red reflex</li> </ul> <p>On multivariate analysis</p> <ul style="list-style-type: none"> <li>older age</li> <li>poor preoperative CDVA</li> <li>left eye</li> <li>prior pars plana vitrectomy</li> <li>dementia</li> <li>zonule dehiscence</li> </ul> | Just identified risk factors                                                                                                                                   |
| Mylona et al. (4)    | 2020 | New                        | <p>high-risk (9 points each)</p> <ul style="list-style-type: none"> <li>Phacodonesis</li> <li>dense/total/ white or brunescent cataract</li> <li>pseudoexfoliation</li> </ul> <p>moderate-risk (3 points each)</p> <ul style="list-style-type: none"> <li>Glaucoma</li> <li>poor cooperation</li> </ul>                                                                                                                                                                                                                                                                                                                                                                               | 3 risk groups and a no-risk group 1:<br>-Low risk group : 1 point<br>-Moderate-risk group : sum of 3 points<br>-High-risk group : sum of 9 points              |

|                      |      |     |                                                                                                                                                                                                                                                                                                                                                                                                                                                                                                                                                                                                                                                                                                                                                                                                                                                          |                                                                                                                                                                                                                                                                                                                 |
|----------------------|------|-----|----------------------------------------------------------------------------------------------------------------------------------------------------------------------------------------------------------------------------------------------------------------------------------------------------------------------------------------------------------------------------------------------------------------------------------------------------------------------------------------------------------------------------------------------------------------------------------------------------------------------------------------------------------------------------------------------------------------------------------------------------------------------------------------------------------------------------------------------------------|-----------------------------------------------------------------------------------------------------------------------------------------------------------------------------------------------------------------------------------------------------------------------------------------------------------------|
|                      |      |     | <ul style="list-style-type: none"> <li>• corneal scarring</li> <li>• shallow anterior chamber</li> </ul> <p>low-risk (1 point each)</p> <ul style="list-style-type: none"> <li>• deep orbit</li> <li>• ametropia</li> <li>• vitrectomy</li> <li>• loss of 1 eye</li> <li>• small pupil</li> <li>• age younger than 50 years or older than 85 years</li> <li>• diabetes</li> <li>• a1-antagonist use</li> </ul>                                                                                                                                                                                                                                                                                                                                                                                                                                           |                                                                                                                                                                                                                                                                                                                 |
| Zetterberg et al.(5) | 2020 | New | <ul style="list-style-type: none"> <li>• best-corrected visual acuity (BCVA) <math>\leq 0.1</math></li> <li>• pseudoexfoliation (PEX)</li> <li>• sight-threatening ocular comorbidity other than age-related macular degeneration (AMD), diabetic retinopathy, glaucoma, or cornea guttata ;</li> <li>• use of Trypan blue</li> <li>• mechanical pupil dilation</li> <li>• iris hooks at the rhexis margin</li> </ul>                                                                                                                                                                                                                                                                                                                                                                                                                                    | A composite risk score using odds ratio                                                                                                                                                                                                                                                                         |
| Ergun et al. (6)     | 2018 | New | <ul style="list-style-type: none"> <li>• Age (60–69/B80)</li> <li>• male gender</li> <li>• pupil size B3 mm</li> <li>• mature- brunescent cataract</li> <li>• anterior chamber depth <math>\geq 2.5</math> mm posterior polar cataract</li> <li>• diabetic retinopathy</li> <li>• coronary artery disease</li> <li>• surgeon factor (junior resident/senior resident; senior resident/specialist in ophthalmology; junior resident/specialist in ophthalmology)</li> </ul>                                                                                                                                                                                                                                                                                                                                                                               | A composite risk score using odds ratio                                                                                                                                                                                                                                                                         |
| Nderitu et al. (7)   | 2018 | New | <p>Factors associated with PCR</p> <ul style="list-style-type: none"> <li>• age</li> <li>• male sex</li> <li>• systemic a-blocker use</li> <li>• glaucoma</li> <li>• diabetic retinopathy</li> <li>• axial length (AL)</li> <li>• small pupil less than 4.0 mm</li> <li>• poor positioning</li> <li>• white cataract</li> <li>• no fundal view</li> <li>• pseudoexfoliation or phacodonesis</li> </ul> <p>Patient-specific factors</p> <ul style="list-style-type: none"> <li>• significant hearing impairment</li> <li>• previous iridectomy</li> <li>• previous cystoid macula edema [CME] or retinal vein occlusion</li> <li>• guttata, or increased corneal thickness</li> <li>• anterior chamber depth [<math>\geq 2.5</math> mm], or spherical equivalent more than 5.0 diopters</li> <li>• permanent poor vision in the unoperated eye</li> </ul> | <p>5 complexity groups:</p> <ul style="list-style-type: none"> <li>-Group 1: score 0 to 1</li> <li>-Group 2: score 2 to 3</li> <li>-Group 3: score 4 to 7</li> <li>-Group 4: score 8 to 9</li> <li>-Group 5: score 10 or more</li> </ul> <p>(Each variable is attributed an approximate proportional score)</p> |
| Hashemi et al. (8)   | 2013 | New | <p>On univariate analysis</p> <ul style="list-style-type: none"> <li>• diabetes mellitus</li> <li>• shallow anterior chamber</li> </ul>                                                                                                                                                                                                                                                                                                                                                                                                                                                                                                                                                                                                                                                                                                                  | Just identified risk factors                                                                                                                                                                                                                                                                                    |

|                       |      |     |                                                                                                                                                                                                                                                                                                                                                                                                                                                                                                      |                                                                                                                 |
|-----------------------|------|-----|------------------------------------------------------------------------------------------------------------------------------------------------------------------------------------------------------------------------------------------------------------------------------------------------------------------------------------------------------------------------------------------------------------------------------------------------------------------------------------------------------|-----------------------------------------------------------------------------------------------------------------|
|                       |      |     | <ul style="list-style-type: none"> <li>• absence of supervision by a faculty member</li> <li>• larger capsulorhexis</li> <li>• anterior capsule tear</li> <li>• longer effective phacoemulsification time (EPT)</li> </ul> <p>On multivariate analysis</p> <ul style="list-style-type: none"> <li>• anterior capsule tear</li> <li>• longer EPT</li> <li>• lack of supervision by attending physicians</li> </ul>                                                                                    |                                                                                                                 |
| Rutar et al. (9)      | 2009 | New | <p>On univariate analysis</p> <ul style="list-style-type: none"> <li>• challenging case (mature cataracts and potential zonular pathology were most strongly associated with major complications)</li> <li>• wound type</li> <li>• phacoemulsification technique preoperative visual acuity</li> </ul> <p>On multivariate analysis</p> <ul style="list-style-type: none"> <li>• challenging case</li> </ul>                                                                                          | Just identified risk factors                                                                                    |
| Lomi et al. (10)      | 2015 | New | <ul style="list-style-type: none"> <li>• Increase in success rate was seen with increase in semester and number of surgeries performed.</li> </ul> <p>Systemic and ocular features of patients as well as type of machine (longitudinal versus torsional longitudinal) had no significant association in terms of complication rate.</p>                                                                                                                                                             | Just identified risk factors                                                                                    |
| Gharaei et al. (11)   | 2015 | New | <ul style="list-style-type: none"> <li>• poor red reflex</li> <li>• pseudoexfoliation</li> <li>• poor pupil dilation</li> <li>• corneal clouding</li> <li>• dense cataract</li> <li>• shallow anterior chamber</li> <li>• advanced age</li> </ul>                                                                                                                                                                                                                                                    | Just identified risk factors                                                                                    |
| Narendran et al. (12) | 2009 | New | <ul style="list-style-type: none"> <li>• increasing age</li> <li>• male gender</li> <li>• presence of glaucoma</li> <li>• diabetic retinopathy</li> <li>• brunescant/white cataract</li> <li>• no fundal view/vitreous opacities</li> <li>• pseudo-exfoliation/phacodonesis</li> <li>• reducing pupil size</li> <li>• axial length &gt; or = 26.0 mm</li> <li>• the use of the alpha-blocker doxazosin</li> <li>• inability to lie flat</li> <li>• trainee surgeons performing operations</li> </ul> | A composite risk score using odds ratio                                                                         |
| Saifee et al. (13)    | 2020 | New | <ul style="list-style-type: none"> <li>• pseudoexfoliation</li> <li>• proliferative diabetic retinopathy</li> <li>• previous vitrectomy</li> <li>• a 4+ dense, white, or brunescant cataract</li> <li>• current tamsulosin use</li> <li>• preexisting zonular dialysis</li> <li>• intraoperative use of iris hooks</li> <li>• intraoperative use of a pupillary expansion device</li> </ul>                                                                                                          | 3 risk groups:<br>low risk (0 risk factors)<br>intermediate risk (1 risk factor)<br>high risk (≥2 risk factors) |
| Habib et al. (14)     | 2005 | New | <p>General condition</p> <ul style="list-style-type: none"> <li>• Unable to lie flat (spinal deformity, asthma, heart failure)</li> <li>• Severe anxiety</li> </ul>                                                                                                                                                                                                                                                                                                                                  | A cumulative risk score<br>(Total scores could range from 1 in simple cases to a maximum possible score of      |

|                       |      |     |                                                                                                                                                                                                                                                                                                                                                                                                                                                                                                                                                                                                                                                                                                                                                                                                                             |                                                                                                                                                                                                            |
|-----------------------|------|-----|-----------------------------------------------------------------------------------------------------------------------------------------------------------------------------------------------------------------------------------------------------------------------------------------------------------------------------------------------------------------------------------------------------------------------------------------------------------------------------------------------------------------------------------------------------------------------------------------------------------------------------------------------------------------------------------------------------------------------------------------------------------------------------------------------------------------------------|------------------------------------------------------------------------------------------------------------------------------------------------------------------------------------------------------------|
|                       |      |     | <ul style="list-style-type: none"> <li>• Head tremors</li> </ul> <p>Ocular history</p> <ul style="list-style-type: none"> <li>• Previous angle closure glaucoma</li> <li>• History of complications in fellow eye</li> <li>• Previous vitrectomy plus or minus silicone oil</li> </ul> <p>Ocular co-morbidity</p> <ul style="list-style-type: none"> <li>• Corneal cloudiness</li> <li>• Shallow anterior chamber</li> <li>• Poor pupillary dilatation and/or posterior synechiae</li> <li>• Pseudoexfoliation</li> <li>• Weak zonules</li> <li>• High hypermetropia (axial length ,20)</li> <li>• High myopia (axial length .27)</li> </ul> <p>Cataract density</p> <ul style="list-style-type: none"> <li>• Nuclear density grade 1–2</li> <li>• Nuclear density grade 3</li> <li>• Mature brunescant cataract</li> </ul> | <p>13 points in difficult cases)</p> <p>(Each variable is attributed an approximate proportional score)</p>                                                                                                |
| Najjar and Awwad (15) | 2003 | New | <ul style="list-style-type: none"> <li>• Age</li> <li>• type of anesthesia administered</li> <li>• density of the cataract</li> <li>• frontal bossing or sunken globes</li> <li>• pseudoexfoliation</li> <li>• extremes of refraction</li> <li>• a history of glaucoma or uveitis</li> <li>• previous intraocular surgery</li> <li>• a history of complications in the fellow eye</li> <li>• poor pupil dilation</li> <li>• shallow anterior chamber</li> <li>• corneal cloudiness</li> <li>• poor red reflex</li> </ul>                                                                                                                                                                                                                                                                                                    | <p>A cumulative risk score (The risk score can vary from 2 to 25, with 2 given to the simplest case and 25 to the most complex)</p> <p>(Each variable is attributed an approximate proportional score)</p> |

Reference:

1. Muhtaseb M, Kalhor A, Ionides A. A system for preoperative stratification of cataract patients according to risk of intraoperative complications: a prospective analysis of 1441 cases. *Br J Ophthalmol* (2004) 88:1242. doi: 10.1136/bjo.2004.046003
2. Kaur M, Bhai N, Titiyal JS. Risk factors for complications during phacoemulsification cataract surgery. *Expert Rev Ophthalmol* (2020) 15:303–312. doi: 10.1080/17469899.2020.1806715
3. Blomquist PH, Morales ME, Tong L, Ahn C. Risk factors for vitreous complications in resident-performed phacoemulsification surgery. *J Cataract Refract Surg* (2012) 38:208–214. doi: 10.1016/j.jcrs.2011.10.001
4. Mylona I, Dermenoudi M, Glynatsis M, Ziakas N, Tsinopoulos I. Development of a reliable preoperative risk stratification system for phacoemulsification. *J Cataract Refract Surg* (2020) 46:1132–1137. doi: 10.1097/j.jcrs.0000000000000223
5. Zetterberg M, Kugelberg M, Nilsson I, Lundström M, Behndig A, Montan P. A Composite Risk Score for Capsule Complications Based on Data from the Swedish National Cataract Register: Relation to Surgery Volumes. *Ophthalmology* (2021) 128:364–371. doi: 10.1016/j.ophtha.2020.07.033
6. Ergun ŞB, Kocamış Sİ, Çakmak HB, Çağıl N. The evaluation of the risk factors for capsular complications in phacoemulsification. *Int Ophthalmol* (2018) 38:1851–1861. doi: 10.1007/s10792-017-0667-3
7. Nderitu P, Ursell P. Updated cataract surgery complexity stratification score for trainee ophthalmic surgeons. *J Cataract Refract Surg* (2018) 44:709–717. doi: 10.1016/j.jcrs.2018.04.036

8. Hashemi H, Mohammadpour M, Jabbarvand M, Nezamdoost Z, Ghadimi H. Incidence of and risk factors for vitreous loss in resident-performed phacoemulsification surgery. *J Cataract Refract Surg* (2013) 39:1377–1382. doi: 10.1016/j.jcrs.2013.03.028
9. Rutar T, Porco TC, Naseri A. Risk Factors for Intraoperative Complications in Resident-Performed Phacoemulsification Surgery. *Ophthalmology* (2009) 116:431–436. doi: 10.1016/j.optha.2008.10.028
10. Lomi N, Sharma R, Khokhar S, Dada T, Vanathi M, Agarwal T. Risk factors for intra-operative complications during phacoemulsification performed by residents. *Int Ophthalmol* (2016) 36:401–406. doi: 10.1007/s10792-015-0146-7
11. Gharaei H, Sedaghat MR, Banan S. Evaluation of the Correspondence between Preoperative Risk Factors and Intraoperative Complications in Resident-Performed Phacoemulsification. *J Patient Saf Qual Improv* (2015) 3:273–276. doi: 10.22038/psj.2015.5243
12. Narendran N, Jaycock P, Johnston RL, Taylor H, Adams M, Tole DM, Asaria RH, Galloway P, Sparrow JM. The Cataract National Dataset electronic multicentre audit of 55,567 operations: risk stratification for posterior capsule rupture and vitreous loss. *Eye Lond Engl* (2009) 23:31–37. doi: 10.1038/sj.eye.6703049
13. Saifee M, Zhu I, Lin Y, Oldenburg CE, Ramanathan S. Effect of full-time vs volunteer faculty supervision on resident cataract surgery complications. *J Cataract Refract Surg* (2020) 46:700–704. doi: 10.1097/j.jcrs.0000000000000145
14. Habib MS, Bunce CV, Fraser SG. The role of case mix in the relation of volume and outcome in phacoemulsification. *Br J Ophthalmol* (2005) 89:1143–1146. doi: 10.1136/bjo.2005.070235
15. Najjar DM, Awwad ST. Cataract surgery risk score for residents and beginning surgeons. *J Cataract Refract Surg* (2003) 29:2036–2037. doi: 10.1016/j.jcrs.2003.08.004
